# Supplementary material for: Living with nystagmus: a qualitative study
Source: HighWire-hosted journal article supplement (doi:10.1136/bjophthalmol-2011-301183), 2012-04-19
Supplement: Patient_Table.pdf [file Patient_Table.pdf]

| Participant Number | Gender | Age | IN or AN | Associated deficits  | LogMAR VA | Head Posture >5° | Predominant Waveform -5 to 5° of null | NAFX at Null (logMAR) | Intensity at Null (°/s) | Longest Foveation Domain (°) | Able to Drive |
|--------------------|--------|-----|----------|----------------------|-----------|------------------|---------------------------------------|-----------------------|-------------------------|------------------------------|---------------|
| 1                  | M      | 22  | IN       | Albinism             | 0.20      | N                | Jerk Extended Foveation               | -0.02                 | 4.5                     | 60                           | Y             |
| 2                  | M      | 44  | AN       | Multiple sclerosis   | 0.80      | Y                | Vertical pendular                     | 0.95                  | 8.2                     | Not available                | N             |
| 3                  | F      | 27  | IN       | None                 | 0.30      | N                | Pendular foveating Saccades           | 0.20                  | 13.3                    | 28                           | Y             |
| 4                  | F      | 63  | AN       | Multiple sclerosis   | 0.30      | N                | Pendular                              | 0.76                  | 7.8                     | Not available                | N             |
| 5                  | F      | 36  | IN       | None                 | 0.18      | N                | Jerk Extended Foveation               | -0.02                 | 3.4                     | 33                           | Y             |
| 6                  | M      | 42  | IN       | Albinism             | 1.20      | N                | Pendular foveating Saccades           | 0.30                  | 28.2                    | VA too poor                  | N             |
| 7                  | M      | 29  | IN       | Albinism             | 0.80      | N                | Pseudo Cycloid                        | 0.03                  | 4.4                     | 23                           | N             |
| 8                  | M      | 25  | IN       | Achiasmia            | 0.54      | N                | See Saw (pendular)                    | 0.10                  | 5.2                     | 23                           | N             |
| 9                  | F      | 47  | IN       | None                 | 0.30      | Y                | Bi-directional Jerk                   | 0.32                  | 8.9                     | 35                           | N             |
| 10                 | M      | 52  | IN       | None                 | 0.30      | Y                | Pseudo Cycloid                        | 0.34                  | 8.1                     | 39                           | N             |
| 11                 | M      | 57  | IN       | None                 | 0.26      | Y                | Pseudo Cycloid                        | 0.12                  | 5.1                     | 56                           | N             |
| 12                 | F      | 22  | IN       | None                 | 0.16      | Y                | Pendular foveating Saccades           | 0.64                  | 12.0                    | 33                           | Y             |
| 13                 | F      | 26  | IN       | None                 | 0.50      | Y                | Pseudo Cycloid                        | 0.52                  | 18.1                    | 28                           | N             |
| 14                 | M      | 32  | IN       | None                 | 0.28      | Y                | Pendular foveating Saccades           | 0.26                  | 16.5                    | 31                           | N             |
| 15                 | M      | 49  | IN       | Albinism             | 0.80      | N                | Periodic Alternating Nystagmus        |                       |                         |                              | N             |
| 16                 | F      | 60  | IN       | Achromatopsia        | 1.00      | N                | Pendular                              | 0.10                  | 3.1                     | VA too poor                  | N             |
| 17                 | M      | 25  | IN       | None                 | 0.00      | Y                | Periodic Alternating Nystagmus        |                       |                         |                              | Y             |
| 18                 | F      | 20  | IN       | Albinism             | 0.50      | N                | Bi-directional Jerk                   | 0.27                  | 13.4                    | Not available                | N             |
| 19                 | M      | 35  | IN       | Albinism             | 0.56      | N                | Periodic Alternating Nystagmus        |                       |                         |                              | N             |
| 20                 | M      | 50  | IN       | Congenital Cataracts | 0.54      | N                | Pseudo Jerk                           | 0.68                  | 24.5                    | 4                            | N             |
| 21                 | F      | 38  | IN       | Albinism             | 0.44      | Y                | Pseudo Cycloid                        | 0.30                  | 16.8                    | 39                           | N             |

Additional Individual Participant Characteristics. Infantile (IN) and acquired nystagmus (AN), for those with infantile nystagmus afferent deficits they had, if any. LogMAR visual acuity (VA) and any the presence of head posture greater than 5°. Values obtained from eye movement recordings using an infrared pupil tracker (Eyelink II) include predominant waveform observed between -5 to 5° of the null region, nystagmus intensity (°/s) and NAFX (expanded nystagmus acuity function); a prediction of logMAR VA based upon foveation characteristics (further information regarding the NAFX can be found at [www.omlab.org](http://www.omlab.org)). The longest foveation domain (a maximum of 60°) and those that could drive are also documented.
